# Supplementary material
Source: PubMed Central journal article supplement (PMC2867408)

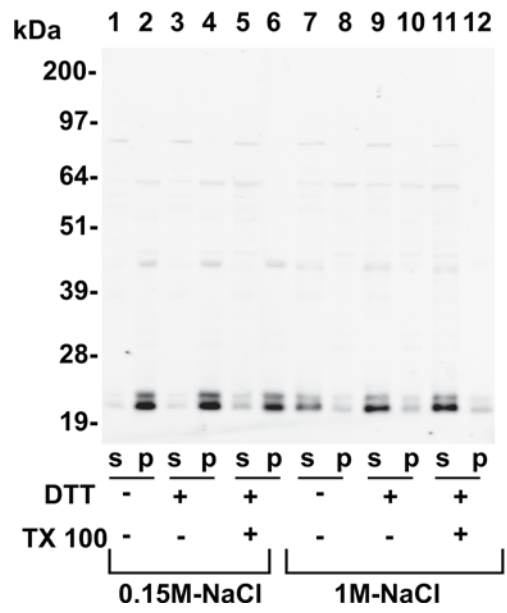

Supplement: 00662.2009_1.pdf [file 00662.2009_1.pdf]
